# Supplementary material
Source: publisher site journal article supplement (https://www.dovepress.com/get_supplementary_file.php?f=333141.docx)
Supplement: Supplementary file 1 [file get_supplementary_file.php]

**Supplementary Figures and Tables**

**
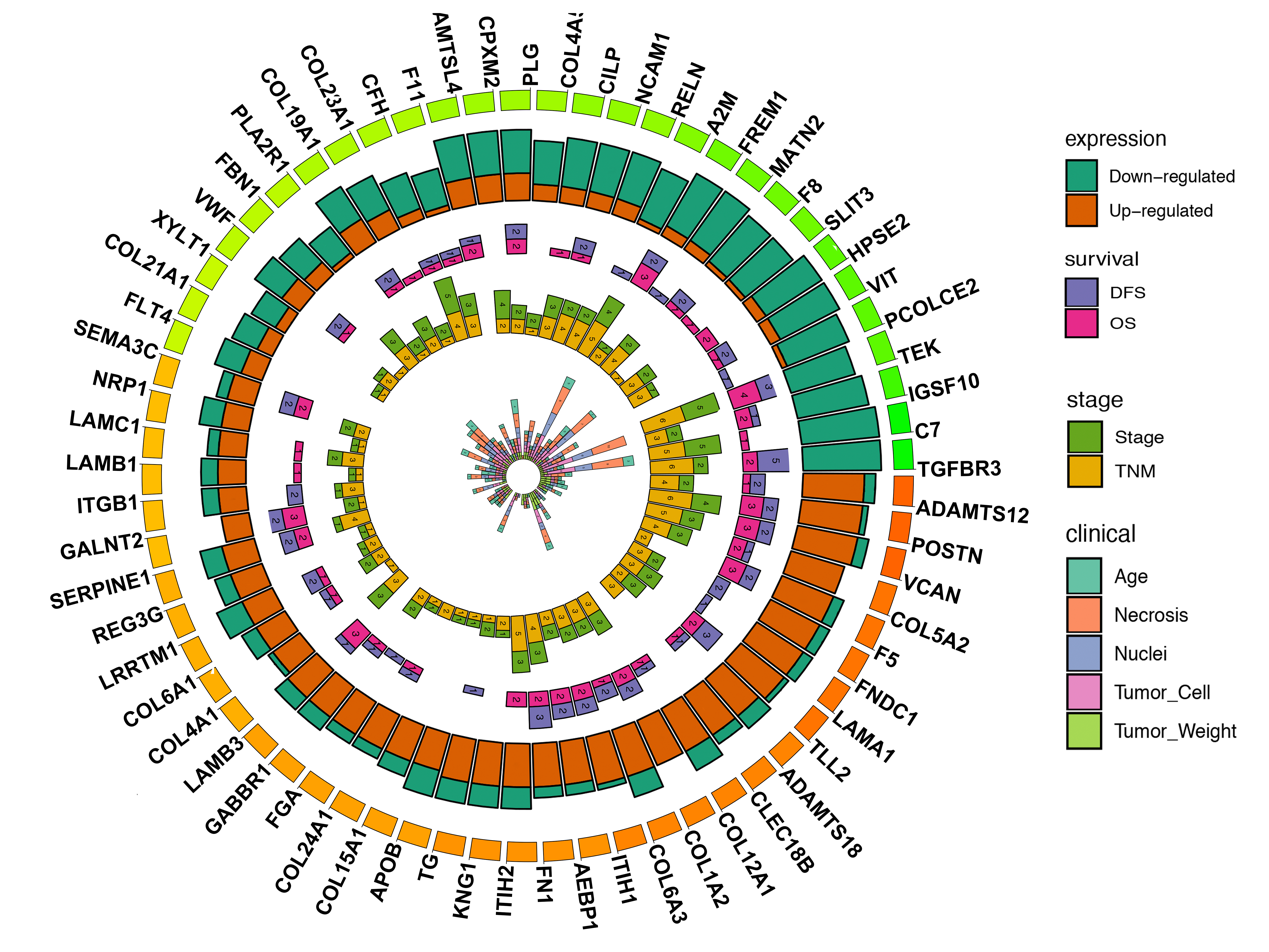
**

**Supplementary Figure S1. Distribution of 65 prognosis-related secretome genes with clinical outcomes in all cancer patients across 14 major solid tumors.**

Numbers in picture represent cancer types in which secretome gene expression levels were significantly associated with clinical outcomes, including patient survival (DFS and OS), stage (pathologic Stage and pathologic_T) and other clinical phenotypes (patient age, tumor necrosis percent, tumor nuclei percent, tumors cell percent in slides and tumor weight).

**
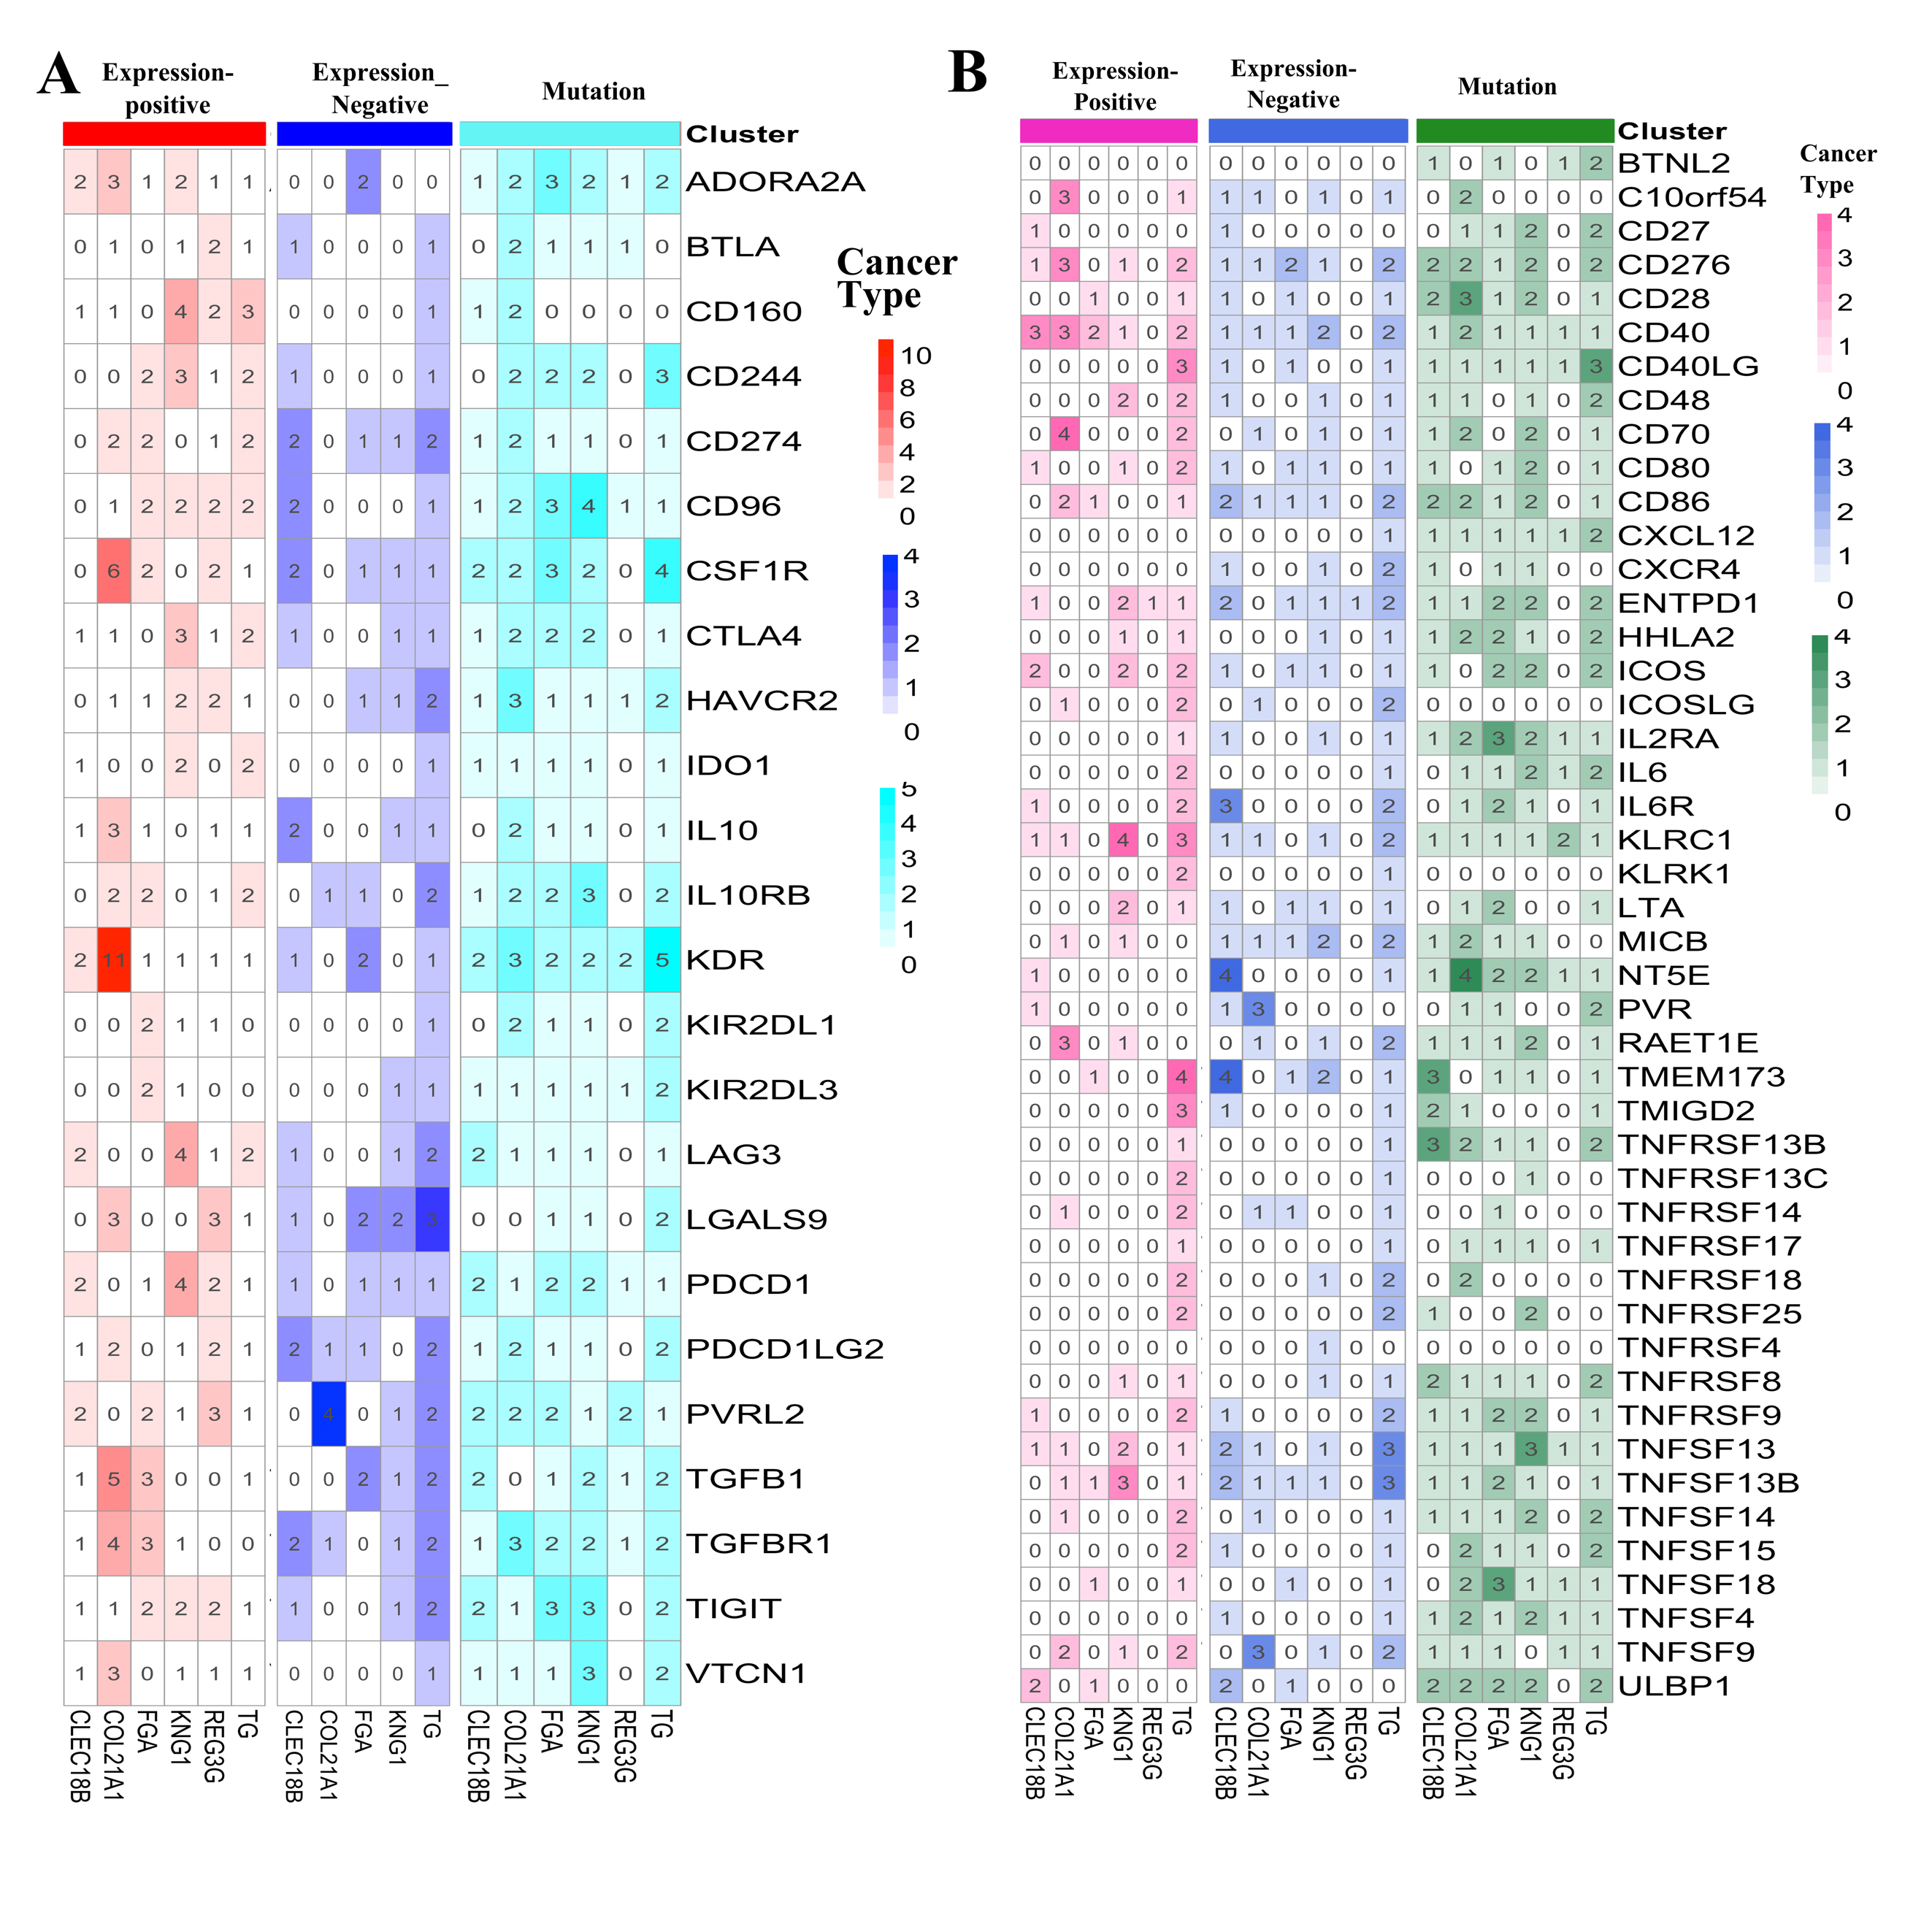
**

**Supplementary Figure S2. Correlations of 6 secretome genes with immune modulator genes.**

Heatmap showing correlations among 6 secretome genes (bottom) and immune-inhibitor genes (A) and immune-stimulator genes (B).

**Supplementary Figure S3. Correlations of secretome genes with TIICs.**

The correlation between fractions of immune infiltration cells and expression levels of 21 core secretome gene (A) and 6 special secretome genes (B). Red and blue numbers indicate positive and negative correlations, respectively. Numbers show cancer types with significant gene pairs.

| **Supplementary Table S1 Sample information and median TMB of 14 cancer types from TCGA database** | | | | | |
| --- | --- | --- | --- | --- | --- |
| **Name** | **Full Name** | **Tumor** | **Normal** | **Total** | **median TMB** |
| BLCA | Bladder Urothelial Carcinoma | 408 | 19 | 427 | 2.96 |
| BRCA | Breast invasive carcinoma | 1100 | 112 | 1212 | 0.78 |
| COAD | Colon adenocarcinoma | 255 | 19 | 274 | 2.22 |
| HNSC | Head and Neck squamous cell carcinoma | 522 | 44 | 566 | 1.84 |
| KICH | Kidney Chromophobe | 66 | 25 | 91 | 0.31 |
| KIRC | Kidney renal clear cell carcinoma | 534 | 72 | 606 | 0.94 |
| KIRP | Kidney renal papillary cell carcinoma | 291 | 32 | 323 | 1.06 |
| LIHC | Liver hepatocellular carcinoma | 372 | 51 | 423 | 1.5 |
| LUAD | Lung adenocarcinoma | 517 | 59 | 576 | 3.34 |
| LUSC | Lung squamous cell carcinoma | 501 | 51 | 552 | 4.04 |
| PRAD | Prostate adenocarcinoma | 499 | 51 | 550 | 0.47 |
| THCA | Thyroid carcinoma | 511 | 57 | 568 | 0.18 |
| UCEC | Uterine Corpus Endometrial Carcinoma | 370 | 11 | 381 | 1.71 |
| STAD | Stomach and Esophageal carcinoma | 415 | 46 | 461 | 2.16 |
|  |  |  |  |  |  |

| **Supplementary Table S2 the number of secretome genes associated with clinical outcomes across 14 solid tumors** | | | | | | | | | | | | | |  |
| --- | --- | --- | --- | --- | --- | --- | --- | --- | --- | --- | --- | --- | --- | --- |
| **Cancer Type** | **Expression ~ clinical outcomes** | | | | | | | | |  | **Mutation ~ clinical outcomes** | | | |
| **OS** | **DFS** | **Stage** | **TNM** | **AGE** | **Necrosis** | **Nuclei** | **Tumor_Cell** | **Tumor_Weight** |  | **OS** | **DFS** | **Stage** | **TNM** |
| **1 Type** | 486 | 508 | 308 | 301 | 410 | 323 | 343 | 305 | 434 |  | 117 | 125 | 302 | 187 |
| **2 Types** | 296 | 289 | 346 | 297 | 377 | 345 | 370 | 227 | 338 |  | 18 | 23 | 79 | 37 |
| **3 Types** | 132 | 84 | 277 | 220 | 226 | 251 | 254 | 171 | 205 |  | 4 | 6 | 13 | 7 |
| **4 Types** | 34 | 18 | 162 | 157 | 110 | 130 | 113 | 156 | 91 |  | 0 | 1 | 3 | 0 |
| **5 Types** | 11 | 3 | 52 | 77 | 33 | 61 | 36 | 112 | 15 |  | 0 | 0 | 1 | 0 |
| **6 Types** | 1 | 0 | 18 | 49 | 6 | 15 | 10 | 78 | 3 |  | 0 | 0 | 0 | 0 |
| **7 Types** | 0 | 0 | 5 | 22 | 2 | 1 | 3 | 30 | 1 |  | 0 | 0 | 0 | 0 |
| **8 Types** | 0 | 0 | 0 | 4 | 0 | 2 | 0 | 3 | 0 |  | 0 | 0 | 0 | 0 |
| **9 Types** | 0 | 0 | 0 | 0 | 0 | 1 | 0 | 1 | 0 |  | 0 | 0 | 0 | 0 |
| **10 Types** | 0 | 0 | 0 | 0 | 0 | 0 | 0 | 1 | 0 |  | 0 | 0 | 0 | 0 |

| **Supplementary Table S3 Expression and genetic alteration of 6 secretome genes associated with clinical outcomes across 14 solid tumors** | | | | | | | | | | | | | | |
| --- | --- | --- | --- | --- | --- | --- | --- | --- | --- | --- | --- | --- | --- | --- |
| **gene** | **Expression ~ clinical outcome** | | | | | | | | |  | **Mutation ~ survival** | | | |
| **DFS** | **OS** | **Stage** | **TNM** | **Age** | **Necrosis** | **Nuclei** | **Tumor_Cell** | **Tumor_Weight** | | |  | **OS** | **DFS** |
| CLEC18B | 0 | 0 | 0 | 0 | 0 | 0 | 2 | 1 | 0 | | |  | 0 | 0 |
| COL21A1 | 0 | 0 | 0 | 0 | 1 | 2 | 0 | 2 | 1 | | |  | 0 | 0 |
| FGA | 1 | 0 | 2 | 2 | 0 | 0 | 0 | 0 | 0 | | |  | 2 | 0 |
| KNG1 | 0 | 0 | 2 | 1 | 0 | 0 | 0 | 0 | 0 | | |  | 2 | 0 |
| REG3G | 0 | 0 | 1 | 1 | 0 | 0 | 0 | 0 | 0 | | |  | 2 | 0 |
| TG | 1 | 0 | 1 | 1 | 0 | 0 | 1 | 0 | 0 | | |  | 6 | 0 |

**Supplementary Table S4 Literature support for the 21 core secretome genes**

| **Name** | **Cancer Type** | **Note** | **Ref.** |
| --- | --- | --- | --- |
| A2M | Lung squamous cell carcinoma | The current study showed that CENPE, NCAPH, MYH11, LRRK2, HSD17B6, and A2M might be the key genes contributed to tumorigenesis or tumor progression in non-small cell lung cancer. | 1 |
| A2M | Prostate cancer | Sufficient Prostate‐Specific Antigen is produced in advanced prostate cancer to alter total A2M levels, and can degrade circulating peptide hormones. | 2 |
| A2M | Pancreatic cancer | Three (MMP7, FOS and A2M) out of the seven predicted gene markers were found to encode proteins secreted into urine, providing potential diagnostic evidences for pancreatic cancer. | 3 |
| A2M | gastric adenocarcinoma | Circulating A2M elevation may be implicated in the development of postoperative depression in these patients. | 4 |
| A2M | Breast cancer | A2M modulates tumour cell adhesion, migration and growth by inhibition of tumour promoting signalling pathways. | 5 |
| A2M | Gliomas | α2-Macroglobulin Inhibits the Malignant Properties of Astrocytoma Cells by Impeding β-Catenin Signaling. | 6 |
| ADAMTS12 | Colorectal cancer | ADAMTS12 expression may be a good prognostic marker for colorectal cancer. | 7 |
| ADAMTS12 | Breast cancer | Concomitant detection of ADAMTS-12 and fibulin-2 could be a good prognosis marker in breast cancer diagnosis. | 8 |
| ADAMTS12 | Gastric cancer | The ADAMTS family (6, 7, 12, 15, and 18) of genes was closely related to the prognosis of GC, and their high expression levels were associated with poor prognosis and survival time. | 9 |
| ADAMTS12 | Ovarian cancer | Tumor levels of ADAM12 mRNA were also associated with shorter progression-free and overall survival as well as with lymphatic and vascular invasion, and residual tumor volume following cytoreductive surgery. | 10 |
| AEBP1 | Gastric cancer | AEBP1 might be served as a promising prognostic indicator and a potential therapeutic target in human gastric cancer. | 11 |
| AEBP1 | colon cancer | EBP1 silencing suppressed colon adenocarcinoma cell proliferation, migration, and invasion, whereas the upregulation of AEBP1 promoted these behaviors. | 12 |
| AEBP1 | Gliomas | AEBP1 exerts its tumor-promoting effects by mainly activating mTOR pathway in Glioma. | 13 |
| COL12A1 | gastric cancer | The results highlighted the importance of COL12A1 in gastric cancer and suggested its potential role as a candidate for clinical outcome prediction and targeted therapy in patients with gastric cancer | 14 |
| COL12A1 | Colorectal cancer | COL12A1 might work as diagnostic, therapeutic, and prognostic biomarker for CRC in the future. | 15 |
| COL15A1 | cervical carcinoma | COL15A was found to suppress tumorigenesis in a dose- dependent manner in human cervical carcinoma cell line. | 16 |
| COL1A2 | Gastric cancer | COL1A2 is a Novel Biomarker to Improve Clinical Prediction in Human Gastric Cancer. | 17 |
| COL1A2 | Colorectal cancer | COL1A2 as a novel tumor suppressor in colorectal cancer and provided a potential therapeutic approach to treat colorectal cancer. | 18 |
| COL1A2 | Ovarian cancer | Certain collagen genes, including COL11A1, COL1A1 and COL1A2, may also influence the metastasis of EOC through the ECM-receptor interaction and cell adhesion signaling pathways. | 19 |
| COL1A2 | Lung cancer | COL1A1, COL1A2, COL3A1 and DCN could be regarded as novel potential biomarkers that predict progression from smokers to lung adenocarcinoma. | 20 |
| COL1A2 | Breast cancer | The combined studies highlight the importance of these osteogenic genes, COL1A1 and COL1A2, and their relationship to both breast cancer development and later spinal metastases. | 21 |
| COL1A2 | Pancreatic cancer | MiR-25-3p could suppress the expression of COL1A2 and inhibit the proliferation, migration and invasion of pancreatic cancercells which provided a new idea for the detection and treatment of pancreatic cancer. | 22 |
| COL1A2 | Head and Neck squamous cell carcinoma | Hypermethylation of collagen α2 (I) gene (COL1A2) is an independent predictor of survival in head and neck cancer | 23 |
| COL24A1 | Hepatocellular carcinoma | The overexpression of COL24A1 in hepatocellular carcinoma may help diagnose hepatocellular carcinoma and evaluate prognosis. | 24 |
| COL24A1 | Head and Neck squamous cell carcinoma | the upregulation of COL22A1 and COL24A1 mRNA may play a critical role in the progression of head and neck squamous cell carcinoma and provide useful information as a prognostic predictor for head and neck squamous cell carcinoma patients. | 25 |
| COL4A1 | Gastric cancer | COL4A1 may promote gastric carcinoma recurrence and could be used as a therapeutic target for gastric carcinoma recurrence. | 26 |
| COL4A1 | Breast cancer | COL4A1 expression can be used as a biomarker of better prognosis of breast cancer patients receiving neoadjuvant chemotherapy. | 27 |
| COL4A1 | Hepatocellular carcinoma | High level of COL4A1 may be a potential biomarker for diagnosis and treatment with FAK or Src inhibitor for hepatocellular carcinoma. | 28 |
| COL4A1 | Renal cancer | The MMP2, DCN, COL4A1, CASR, GPR4, UTS2, and LDLR genes might be used as potential targets to improve diagnosis and immunotherapy biomarkers for renal cell carcinoma. | 29 |
| COL5A2 | Bladder cancer | COL5A2 was correlated with poor clinical outcomes and survivals of patients with bladder cancer, suggesting that it could be regarded as a biomarker of bladder cancer. | 30 |
| COL5A2 | Gastric cancer | High COL5A2 expression is associated with a poor prognosis in gastric cancer, and may be a novel therapeutic target for gastric cancer. | 31,32 |
| COL5A2 | Breast cancer | Increase of COL5A1 reflects tumor progression and may serve as a novel biomarker and therapeutic target for the treatment of breast invasive ductal carcinoma. | 33(p1) |
| COL6A3 | Pancreatic cancer | SPARC, COL6A3, and FBN1 play an important role in tumor-related immune infiltration and may be ideal targets for immune therapy against pancreatic ductal adenocarcinoma. | 34 |
| COL6A3 | Colorectal cancer | COL6A3 may be a promising biomarker or target for the prognosis and treatment of colorectal cancer. | 35 |
| COL6A3 | Lung cancer | The potential associations between COL6A3 polymorphisms and lung cancer risk, which may contribute to the identification of lung cancer patients in a Chinese population. | 36 |
| F8 | Pancreatic cancer | Pancreatic cancer was associated with increased fibrinogen and factor VIII. | 37 |
| FBN1 | Pancreatic cancer | SPARC, COL6A3, and FBN1 play an important role in tumor-related immune infiltration and may be ideal targets for immune therapy against pancreatic cancer. | 34 |
| FBN1 | Breast cancer | FBN1 may be of relevance to processes underlying spread of breast cancer to the lymph nodes. | 38 |
| FBN1 | Ovarian cancer | Four hub genes (COL6A3, CRISPLD2, FBN1 and SERPINF1) were identified to be associated with the prognosis in ovarian cancer, which might be used as monitoring biomarkers to evaluate survival time of ovarian cancer patients. | 39 |
| FBN1 | Colorectal cancer | PARC, DCN, FBN1, WWTR1, TAGLN, DDX28 and CSDC2 may contribute to the development of early-onset colorectal cancer and may serve as potential diagnostic biomarkers. | 40 |
| FLT4 | Colorectal cancer | FLT4 is identified as a marker of metastatic disease, and as a response marker for small molecule therapeutics that inhibit colorectal cancer metastasis. | 41 |
| FLT4 | clear cell renal cell carcinoma | Clinical and mechanistic data identify germline genetic variants in VEGFA and FLT4 as markers of survival in patients with metastatic renal cell carcinoma. | 42 |
| FLT4 | Lung cancer | Flt-4-positive endothelial cell density, not Flt-4 status in tumor cells, was a significant prognostic factor in non-small cell lung cancer. | 43 |
| FN1 | Gastric cancer | the expression of FN1 in GC tissues is upregulated compared with adjacent normal tissues, and it is a potential biomarker of poor prognosis in patients with gastric cancer. | 44 |
| FN1 | renal cell carcinoma | FN1 mRNA expression might serve as a marker for renal cell carcinoma aggressiveness. | 45 |
| FN1 | Thyroid cancer | Silencing of FN1 in TPC-1 and BCPAP thyroid cancer cells significantly reduced proliferation, adhesion, migration, and invasion in both cell lines. | 46 |
| FN1 | Breast cancer | Systematic identification of the key candidate genes in breast cancer stroma. | 47 |
| FN1 | Gliomas | The prominent role played by FN1 in stimulating glioma growth, invasion, and survival through the activation of the PI3K/AKT signaling pathway. | 48 |
| FN1 | Colorectal cancer | HMGA2 bound directly to the promoters of FN1 and IL11 and significantly induced their transcriptional activities. | 49 |
| LAMB3 | Thyroid cancer | knockdown of LAMB3 inhibited the proliferation, colony formation, migration, and invasive capacity of papillary thyroid cancer. | 50 |
| POSTN | Colorectal cancer | POSTN overexpression in tumor stroma of colorectal cancers could be a possible candidate marker for predicting poor prognosis in patients with colorectal cancers. | 51 |
| POSTN | Colon cancer | Survival-promoting function is crucial for periostin to promote tumor metastasis of colon cancer. | 52 |
| POSTN | Head and Neck squamous cell carcinoma | CAF-derived POSTN might promote cancer stemness via interacting with PTK7 in head and neck squamous cell carcinoma, suggesting that the combination of POSTN and PTK7 might be a potential prognostic and diagnostic indicator and a promising therapeutic target. | 53(p7) |
| POSTN | Pancreatic cancer | two four-hub gene modules as specific predictive signatures for the diagnosis and prognosis of pancreatic cancer, which may bring new sight for the clinical practice of pancreatic cancer. | 54 |
| POSTN | Prostate cancer | POSTN is associated with poor clinical features and worse outcome in patients with prostate cancer. | 55 |
| SEMA3C | Breast cancer | Increased expression of SEMA3C may be modulating breast cancer progression and angiogenesis, and could represent a biomarker of metastatic disease. | 56 |
| SEMA3C | Cervical cancer | SEMA3C is correlated with poor prognosis of cervical cancer patients and promotes tumor growth via the activation of the p-ERK pathway. | 57 |
| SEMA3C | Gliomas | Increased levels of Sema3C protein may be associated with the progression of glioma tumor and has a potential as a prognostic marker for outcome of glioma patients. | 58 |
| SEMA3C | Prostate cancer | SEMA3C promotes migration and invasion in vitro and cell dissemination in vivo. | 59 |
| SLIT3 | Hepatocellular carcinoma | Restoration or overexpression of Slit3 is a potential therapeutic approach to repress the tumor growth and enhance the efficacy of chemotherapeutic agents. | 60 |
| SLIT3 | Lung cancer | Slit3 is a potential tumor suppressor in lung adenocarcinoma. | 61 |
| TEK | Lung cancer | Expressions of 14 hub genes were associated with prognosis of NSCLC patients, providing provide some potential underlying biomarkers for non-small cell lung cancer. | 62 |
| TEK | Clear cell renal cell carcinoma | TEK is a potential biomarker for clear cell renal cell carcinoma. | 63 |
| VCAN | Clear cell renal cell carcinoma | the oncogenic role of VCAN in renal cell carcinogenesis and suggests that this gene has therapeutic and/or biomarker potential for renal cell cancer | 64 |
| VCAN | Colon cancer | VCAN is a promising biomarker to identify stage II-III patients at high risk of relapse who may benefit from intensive postoperative management. | 65 |
| VCAN | Colorectal cancer | VCAN and VEGF were associated with survival in CRC patients with PM after CRS and HIPEC. Independent validation in a well-defined patient cohort is required to confirm the putative prognostic role of these candidate biomarkers. | 66 |
| VCAN | Gastric cancer | VCAN is expressed at high levels in gastric cancer, and represents a potential independent molecular marker for diagnosis and prognosis of gastric cancer. | 67 |
| VWF | Clear cell renal cell carcinoma | The gene five genes in clear cell renal cell carcinoma pathogenesis, including ENO2, CCND1, PLT1, PLG and VWF, may serve as potential prognostic biomarkers in clear cell renal cell carcinoma. | 68 |
| VWF | Colorectal cancer | The association between higher mortality or thrombotic complications and increased platelet count, increased VWF:Ag levels and decreased ADAMTS13 activity in colorectal cancer. | 69 |
| VWF | Hepatocellular carcinoma | VWF is a potentially useful biomarker to diagnose severe liver fibrosis and predict hepatocellular carcinoma development. | 70 |

**Reference**

1. Ma Q, Xu Y, Liao H, et al. Identification and validation of key genes associated with non-small-cell lung cancer. *J Cell Physiol*. 2019;234(12):22742-22752. doi:10.1002/jcp.28839

2. Kostova MB, Brennen WN, Lopez D, et al. PSA-alpha-2-macroglobulin complex is enzymatically active in the serum of patients with advanced prostate cancer and can degrade circulating peptide hormones. *The Prostate*. 2018;78(11):819-829. doi:https://doi.org/10.1002/pros.23539

3. Wang Y, Liu K, Ma Q, et al. Pancreatic cancer biomarker detection by two support vector strategies for recursive feature elimination. *Biomark Med*. 2019;13(2):105-121. doi:10.2217/bmm-2018-0273

4. Fujita T, Nagayama A, Anazawa S. Circulating alpha-2-macroglobulin levels and depression scores in patients who underwent abdominal cancer surgery. *J Surg Res*. 2003;114(1):90-94. doi:10.1016/s0022-4804(03)00194-x

5. Kurz S, Thieme R, Amberg R, et al. The anti-tumorigenic activity of A2M-A lesson from the naked mole-rat. *PLoS One*. 2017;12(12):e0189514. doi:10.1371/journal.pone.0189514

6. Lindner I, Hemdan NYA, Buchold M, et al. Alpha2-macroglobulin inhibits the malignant properties of astrocytoma cells by impeding beta-catenin signaling. *Cancer Res*. 2010;70(1):277-287. doi:10.1158/0008-5472.CAN-09-1462

7. Wang D, Zhu T, Zhang F-B, He C. Expression of ADAMTS12 in colorectal cancer-associated stroma prevents cancer development and is a good prognostic indicator of colorectal cancer. *Dig Dis Sci*. 2011;56(11):3281-3287. doi:10.1007/s10620-011-1723-x

8. Fontanil T, Rúa S, Llamazares M, et al. Interaction between the ADAMTS-12 metalloprotease and fibulin-2 induces tumor-suppressive effects in breast cancer cells. *Oncotarget*. 2014;5(5):1253-1264. doi:10.18632/oncotarget.1690

9. Liang L, Zhu J-H, Chen G, Qin X-G, Chen J-Q. Prognostic Values for the mRNA Expression of the ADAMTS Family of Genes in Gastric Cancer. *J Oncol*. 2020;2020:9431560. doi:10.1155/2020/9431560

10. Cheon D-J, Li AJ, Beach JA, et al. ADAM12 is a prognostic factor associated with an aggressive molecular subtype of high-grade serous ovarian carcinoma. *Carcinogenesis*. 2015;36(7):739-747. doi:10.1093/carcin/bgv059

11. Liu J-Y, Jiang L, Liu J-J, et al. AEBP1 promotes epithelial-mesenchymal transition of gastric cancer cells by activating the NF-κB pathway and predicts poor outcome of the patients. *Sci Rep*. 2018;8(1):11955. doi:10.1038/s41598-018-29878-6

12. Xing Y, Zhang Z, Chi F, et al. AEBP1, a prognostic indicator, promotes colon adenocarcinoma cell growth and metastasis through the NF-κB pathway. *Mol Carcinog*. 2019;58(10):1795-1808. doi:10.1002/mc.23066

13. You Y, Ru X, Lei W, et al. Developing the novel bioinformatics algorithms to systematically investigate the connections among survival time, key genes and proteins for Glioblastoma multiforme. *BMC Bioinformatics*. 2020;21(Suppl 13):383. doi:10.1186/s12859-020-03674-4

14. Jiang X, Wu M, Xu X, et al. COL12A1, a novel potential prognostic factor and therapeutic target in gastric cancer. *Mol Med Rep*. 2019;20(4):3103-3112. doi:10.3892/mmr.2019.10548

15. Wu Y, Xu Y. Integrated bioinformatics analysis of expression and gene regulation network of COL12A1 in colorectal cancer. *Cancer Med*. 2020;9(13):4743-4755. doi:10.1002/cam4.2899

16. Harris A, Harris H, Hollingsworth MA. Complete suppression of tumor formation by high levels of basement membrane collagen. *Mol Cancer Res*. 2007;5(12):1241-1245. doi:10.1158/1541-7786.MCR-07-0200

17. Rong L, Huang W, Tian S, Chi X, Zhao P, Liu F. COL1A2 is a Novel Biomarker to Improve Clinical Prediction in Human Gastric Cancer: Integrating Bioinformatics and Meta-Analysis. *Pathol Oncol Res*. 2018;24(1):129-134. doi:10.1007/s12253-017-0223-5

18. Yu Y, Liu D, Liu Z, et al. The inhibitory effects of COL1A2 on colorectal cancer cell proliferation, migration, and invasion. *J Cancer*. 2018;9(16):2953-2962. doi:10.7150/jca.25542

19. Li S, Li H, Xu Y, Lv X. Identification of candidate biomarkers for epithelial ovarian cancer metastasis using microarray data. *Oncol Lett*. 2017;14(4):3967-3974. doi:10.3892/ol.2017.6707

20. COL1A1, COL1A2, COL3A1 and DCN are Potential Biomarkers to Predict Progression from Smokers to Suffering from Lung Adenocarcinoma. ResearchGate. doi:10.21203/rs.3.rs-76976/v1

21. Lin J, Goldstein L, Nesbit A, Chen MY. Influence of Hormone Receptor Status on Spinal Metastatic Lesions in Patients with Breast Cancer. *World Neurosurg*. 2016;85:42-48. doi:10.1016/j.wneu.2015.07.068

22. Wu J, Liu J, Wei X, et al. A feature-based analysis identifies COL1A2 as a regulator in pancreatic cancer. *J Enzyme Inhib Med Chem*. 2019;34(1):420-428. doi:10.1080/14756366.2018.1484734

23. Misawa K, Kanazawa T, Misawa Y, et al. Hypermethylation of collagen α2 (I) gene (COL1A2) is an independent predictor of survival in head and neck cancer. *Cancer Biomark*. 2011;10(3-4):135-144. doi:10.3233/CBM-2012-0242

24. Yan L, Xu F, Dai C. Overexpression of COL24A1 in Hepatocellular Carcinoma Predicts Poor Prognosis: A Study Based on Multiple Databases, Clinical Samples and Cell Lines. *Onco Targets Ther*. 2020;13:2819-2832. doi:10.2147/OTT.S247133

25. Misawa K, Kanazawa T, Imai A, et al. Prognostic value of type XXII and XXIV collagen mRNA expression in head and neck cancer patients. *Mol Clin Oncol*. 2014;2(2):285-291. doi:10.3892/mco.2013.233

26. Li DF, Wang NN, Chang X, et al. Bioinformatics analysis suggests that COL4A1 may play an important role in gastric carcinoma recurrence. *J Dig Dis*. 2019;20(8):391-400. doi:10.1111/1751-2980.12758

27. Wang S-M, Chen P-M, Sung Y-W, Huang W-C, Huang H-S, Chu P-Y. Effect of COL4A1 Expression on the Survival of Neoadjuvant Chemotherapy Breast Cancer Patients. *J Oncol*. 2020;2020:5209695. doi:10.1155/2020/5209695

28. Wang T, Jin H, Hu J, et al. COL4A1 promotes the growth and metastasis of hepatocellular carcinoma cells by activating FAK-Src signaling. *J Exp Clin Cancer Res*. 2020;39(1):148. doi:10.1186/s13046-020-01650-7

29. Li F, Guo P, Dong K, Guo P, Wang H, Lv X. Identification of Key Biomarkers and Potential Molecular Mechanisms in Renal Cell Carcinoma by Bioinformatics Analysis. *J Comput Biol*. 2019;26(11):1278-1295. doi:10.1089/cmb.2019.0145

30. Zeng X-T, Liu X-P, Liu T-Z, Wang X-H. The clinical significance of COL5A2 in patients with bladder cancer: A retrospective analysis of bladder cancer gene expression data. *Medicine (Baltimore)*. 2018;97(10):e0091. doi:10.1097/MD.0000000000010091

31. Shen H, Wang L, Chen Q, et al. The prognostic value of COL3A1/FBN1/COL5A2/SPARC-mir-29a-3p-H19 associated ceRNA network in Gastric Cancer through bioinformatic exploration. *J Cancer*. 2020;11(17):4933-4946. doi:10.7150/jca.45378

32. The TCGA and GEO databases identify COL5A2 as a poorly prognostic gene in patients with advanced gastric cancer. Published online July 21, 2020. doi:10.21203/rs.3.rs-43511/v1

33. Ren W, Zhang Y, Zhang L, Lin Q, Zhang J, Xu G. Overexpression of collagen type V α1 chain in human breast invasive ductal carcinoma is mediated by TGF-β1. *Int J Oncol*. 2018;52(5):1694-1704. doi:10.3892/ijo.2018.4317

34. Luan H, Zhang C, Zhang T, He Y, Su Y, Zhou L. Identification of Key Prognostic Biomarker and Its Correlation with Immune Infiltrates in Pancreatic Ductal Adenocarcinoma. *Dis Markers*. 2020;2020:8825997. doi:10.1155/2020/8825997

35. Liu W, Li L, Ye H, Tao H, He H. Role of COL6A3 in colorectal cancer. *Oncol Rep*. 2018;39(6):2527-2536. doi:10.3892/or.2018.6331

36. Duan Y, Liu G, Sun Y, et al. COL6A3 polymorphisms were associated with lung cancer risk in a Chinese population. *Respir Res*. 2019;20(1):143. doi:10.1186/s12931-019-1114-y

37. Mattila N, Seppänen H, Mustonen H, Przybyla B, Haglund C, Lassila R. Preoperative Biomarker Panel, Including Fibrinogen and FVIII, Improves Diagnostic Accuracy for Pancreatic Ductal Adenocarcinoma. *Clin Appl Thromb Hemost*. 2018;24(8):1267-1275. doi:10.1177/1076029618779133

38. Mamoor S. Fibrillin-1, encoded by FBN1, is differentially expressed in lymph node metastases in human breast cancer. Published online October 2, 2020. doi:10.31219/osf.io/87h53

39. Chen J, Cai Y, Xu R, Pan J, Zhou J, Mei J. Identification of four hub genes as promising biomarkers to evaluate the prognosis of ovarian cancer in silico. *Cancer Cell Int*. 2020;20:270. doi:10.1186/s12935-020-01361-1

40. Mo X, Su Z, Yang B, Zeng Z, Lei S, Qiao H. Identification of key genes involved in the development and progression of early-onset colorectal cancer by co-expression network analysis. *Oncol Lett*. 2020;19(1):177-186. doi:10.3892/ol.2019.11073

41. Xiao X, Liu Z, Wang R, et al. Genistein suppresses FLT4 and inhibits human colorectal cancer metastasis. *Oncotarget*. 2015;6(5):3225-3239. doi:10.18632/oncotarget.3064

42. Crona DJ, Skol AD, Leppänen V-M, et al. Genetic Variants of VEGFA and FLT4 Are Determinants of Survival in Renal Cell Carcinoma Patients Treated with Sorafenib. *Cancer Res*. 2019;79(1):231-241. doi:10.1158/0008-5472.CAN-18-1089

43. Chen F, Takenaka K, Ogawa E, et al. Flt-4-positive endothelial cell density and its clinical significance in non-small cell lung cancer. *Clin Cancer Res*. 2004;10(24):8548-8553. doi:10.1158/1078-0432.CCR-04-0950

44. Sun Y, Zhao C, Ye Y, et al. High expression of fibronectin 1 indicates poor prognosis in gastric cancer. *Oncol Lett*. 2020;19(1):93-102. doi:10.3892/ol.2019.11088

45. Waalkes S, Atschekzei F, Kramer MW, et al. Fibronectin 1 mRNA expression correlates with advanced disease in renal cancer. *BMC Cancer*. 2010;10:503. doi:10.1186/1471-2407-10-503

46. Sponziello M, Rosignolo F, Celano M, et al. Fibronectin-1 expression is increased in aggressive thyroid cancer and favors the migration and invasion of cancer cells. *Mol Cell Endocrinol*. 2016;431:123-132. doi:10.1016/j.mce.2016.05.007

47. Wang Y, Xu H, Zhu B, Qiu Z, Lin Z. Systematic identification of the key candidate genes in breast cancer stroma. *Cell Mol Biol Lett*. 2018;23:44. doi:10.1186/s11658-018-0110-4

48. Liao Y-X, Zhang Z-P, Zhao J, Liu J-P. Effects of Fibronectin 1 on Cell Proliferation, Senescence and Apoptosis of Human Glioma Cells Through the PI3K/AKT Signaling Pathway. *Cell Physiol Biochem*. 2018;48(3):1382-1396. doi:10.1159/000492096

49. Wu J, Wang Y, Xu X, et al. Transcriptional activation of FN1 and IL11 by HMGA2 promotes the malignant behavior of colorectal cancer. *Carcinogenesis*. 2016;37(5):511-521. doi:10.1093/carcin/bgw029

50. Wang Y, Jin Y, Bhandari A, et al. Upregulated LAMB3 increases proliferation and metastasis in thyroid cancer. *Onco Targets Ther*. 2018;11:37-46. doi:10.2147/OTT.S149613

51. Oh HJ, Bae JM, Wen X-Y, Cho N-Y, Kim JH, Kang GH. Overexpression of POSTN in Tumor Stroma Is a Poor Prognostic Indicator of Colorectal Cancer. *J Pathol Transl Med*. 2017;51(3):306-313. doi:10.4132/jptm.2017.01.19

52. Bao S, Ouyang G, Bai X, et al. Periostin potently promotes metastatic growth of colon cancer by augmenting cell survival via the Akt/PKB pathway. *Cancer Cell*. 2004;5(4):329-339. doi:10.1016/s1535-6108(04)00081-9

53. Yu B, Wu K, Wang X, et al. Periostin secreted by cancer-associated fibroblasts promotes cancer stemness in head and neck cancer by activating protein tyrosine kinase 7. *Cell Death Dis*. 2018;9(11):1082. doi:10.1038/s41419-018-1116-6

54. Zhou Y-Y, Chen L-P, Zhang Y, et al. Integrated transcriptomic analysis reveals hub genes involved in diagnosis and prognosis of pancreatic cancer. *Mol Med*. 2019;25(1):47. doi:10.1186/s10020-019-0113-2

55. Cattrini C, Barboro P, Rubagotti A, et al. Integrative Analysis of Periostin in Primary and Advanced Prostate Cancer. *Transl Oncol*. 2020;13(7):100789. doi:10.1016/j.tranon.2020.100789

56. Cole-Healy Z, Vergani P, Hunter K, Brown NJ, Reed MWR, Staton CA. The relationship between semaphorin 3C and microvessel density in the progression of breast and oral neoplasia. *Exp Mol Pathol*. 2015;99(1):19-24. doi:10.1016/j.yexmp.2015.03.041

57. Liu R, Shuai Y, Luo J, Zhang Z. SEMA3C Promotes Cervical Cancer Growth and Is Associated With Poor Prognosis. *Front Oncol*. 2019;9:1035. doi:10.3389/fonc.2019.01035

58. Vaitkienė P, Skiriutė D, Steponaitis G, Skauminas K, Tamašauskas A, Kazlauskas A. High level of Sema3C is associated with glioma malignancy. *Diagn Pathol*. 2015;10:58. doi:10.1186/s13000-015-0298-9

59. Tam KJ, Hui DHF, Lee WW, et al. Semaphorin 3 C drives epithelial-to-mesenchymal transition, invasiveness, and stem-like characteristics in prostate cells. *Sci Rep*. 2017;7(1):11501. doi:10.1038/s41598-017-11914-6

60. Ng L, Chow AKM, Man JHW, et al. Suppression of Slit3 induces tumor proliferation and chemoresistance in hepatocellular carcinoma through activation of GSK3β/β-catenin pathway. *BMC Cancer*. 2018;18(1):621. doi:10.1186/s12885-018-4326-5

61. Zhang C, Guo H, Li B, et al. Effects of Slit3 silencing on the invasive ability of lung carcinoma A549 cells. *Oncol Rep*. 2015;34(2):952-960. doi:10.3892/or.2015.4031

62. Piao J, Sun J, Yang Y, Jin T, Chen L, Lin Z. Target gene screening and evaluation of prognostic values in non-small cell lung cancers by bioinformatics analysis. *Gene*. 2018;647:306-311. doi:10.1016/j.gene.2018.01.003

63. Ha M, Son YR, Kim J, et al. TEK is a novel prognostic marker for clear cell renal cell carcinoma. *Eur Rev Med Pharmacol Sci*. 2019;23(4):1451-1458. doi:10.26355/eurrev_201902_17102

64. Mitsui Y, Shiina H, Kato T, et al. Versican Promotes Tumor Progression, Metastasis and Predicts Poor Prognosis in Renal Carcinoma. *Mol Cancer Res*. 2017;15(7):884-895. doi:10.1158/1541-7786.MCR-16-0444

65. Chida S, Okayama H, Noda M, et al. Stromal VCAN expression as a potential prognostic biomarker for disease recurrence in stage II-III colon cancer. *Carcinogenesis*. 2016;37(9):878-887. doi:10.1093/carcin/bgw069

66. Sluiter NR, de Cuba EMV, Kwakman R, et al. Versican and vascular endothelial growth factor expression levels in peritoneal metastases from colorectal cancer are associated with survival after cytoreductive surgery and hyperthermic intraperitoneal chemotherapy. *Clin Exp Metastasis*. 2016;33(4):297-307. doi:10.1007/s10585-016-9779-9

67. Li W, Han F, Fu M, Wang Z. High expression of VCAN is an independent predictor of poor prognosis in gastric cancer. *J Int Med Res*. 2020;48(1):300060519891271. doi:10.1177/0300060519891271

68. Luo T, Chen X, Zeng S, et al. Bioinformatic identification of key genes and analysis of prognostic values in clear cell renal cell carcinoma. *Oncol Lett*. 2018;16(2):1747-1757. doi:10.3892/ol.2018.8842

69. Garam N, Maláti É, Sinkovits G, et al. Platelet Count, ADAMTS13 Activity, von Willebrand Factor Level and Survival in Patients with Colorectal Cancer: 5-Year Follow-up Study. *Thromb Haemost*. 2018;118(1):123-131. doi:10.1160/TH17-07-0548

70. Takaya H, Kawaratani H, Tsuji Y, et al. von Willebrand factor is a useful biomarker for liver fibrosis and prediction of hepatocellular carcinoma development in patients with hepatitis B and C. *United European Gastroenterol J*. 2018;6(9):1401-1409. doi:10.1177/2050640618779660
